# Supplementary material
Source: Springer Nature journal article supplement (https://www.springermedizin.de/resource/supplementary/12913_2013_3150_MOESM5_ESM.pdf/9532502)
Supplement: MOESM5 [file 9532502]

**Table 2: Bivariate analysis of household covariates and home delivery**

| Bivariate analysis                   |      |               |         |             |
|--------------------------------------|------|---------------|---------|-------------|
| Variable                             | n    | Unadjusted OR | P value | 95% CI      |
| <b>Age of Head</b>                   | 3103 | 0.99          | 0.876   | 0.99 - 1.00 |
| <b>Head is male</b>                  | 3141 | 0.94          | 0.663   | 0.71 - 1.24 |
| <b>Education of head</b>             | 3142 |               |         |             |
| Primary or below                     |      | 1             | REF     |             |
| Secondary or above                   |      | 0.41          | 0.0001  | 0.35 - 0.49 |
| <b>Employment of head [ii]</b>       | 3142 |               |         |             |
| Formally employed                    |      | 0.43          | 0.0001  | 0.32 - 0.57 |
| Self employed                        |      | 1.06          | 0.66    | 0.82 - 1.37 |
| Unemployed                           |      | 1             | REF     |             |
| <b>Employment type of head [iii]</b> | 3169 |               |         |             |
| Owns business                        |      | 0.67          | 0.006   | 0.50 - 0.89 |
| Salaried                             |      | 0.37          | 0.0001  | 0.30 - 0.46 |
| Skilled laborer                      |      | 0.99          | 0.95    | 0.75 - 1.31 |
| Casual laborer                       |      | 1.16          | 0.254   | 0.90 - 1.48 |
| Farmer                               |      | 1             | REF     |             |
| <b>Household size</b>                | 3115 | 1.06          | 0.0001  | 1.03 - 1.10 |
| <b>People per room</b>               | 3068 | 1.26          | 0.0001  | 1.18 - 1.34 |
| <b>Acres of land owned</b>           | 3142 | 0.99          | 0.39    | 0.98 - 1.01 |
| <b>Nearest facility [iv]</b>         | 2855 |               |         |             |
| Hospital                             |      | 0.55          | 0.0001  | 0.46 - 0.66 |
| Health Center                        |      | 1.01          | 0.953   | 0.75 - 1.35 |
| Dispensary                           |      | 1             | REF     |             |
| <b>Distance in kilometers</b>        | 2855 |               |         |             |
| To any facility (kms)                |      | 1.09          | 0.031   | 1.01 - 1.18 |
| To District Hospital (kms)           |      | 1.1           | 0.0001  | 1.08 - 1.13 |
| To Road (kms)                        |      | 1.46          | 0.011   | 1.09 - 1.95 |
| <b>Distance categories</b>           | 2855 |               |         |             |
| <2km from any facility               |      | 1             | REF     |             |
| >2 km from any facility              |      | 1.21          | 0.035   | 1.01 - 1.46 |
| <4km from District Hospital          |      | 1             | REF     |             |
| >4km from District hospital          |      | 2.32          | 0.0001  | 1.90 - 2.83 |
